# Supplementary material for: A nonlinear mixed‐effects modeling approach for ecological data: Using temporal dynamics of vegetation moisture as an example
Source: PubMed Central journal article supplement (PMC6787861; doi:10.1002/ece3.5543), 2019-08-15
Supplement: ECE3-9-10225-s001.pdf [file ECE3-9-10225-s001.pdf]

## Appendix A1

Here we show how to extract the parameter estimates of the nonlinear mixed-effects model from the R output. For this, the statistical model (1), R output (2), and table of results presented in the manuscript (3), are linked in a new table (4).

(1) Nonlinear mixed-effects model (equation 9 in manuscript, page 12):

$$\text{LFMC}_{ji} \sim \mathcal{N}(\mu_i; \sigma^2)$$

$$\mu_i = \frac{A - w}{1 + e^{(m - t_i)/s}} + w$$

$$\sigma_i^2 = (\sigma_{base} \text{GW}_i + \sigma_{base} \delta_1 \text{GE}_i + \sigma_{base} \delta_2 \text{SM}_i + \sigma_{base} \delta_3 \text{SM}_i)^2$$

$$A = A_{0j} + A_1 \text{GE}_i + A_2 \text{SM}_i + A_3 \text{SS}_i$$

$$w = w_{0j} + w_1 \text{GE}_i + w_2 \text{SM}_i + w_3 \text{SS}_i$$

$$m = m_{0j} + m_1 \text{GE}_i + m_2 \text{SM}_i + m_3 \text{SS}_i$$

$$s = s_{0j} + s_1 \text{GE}_i + s_2 \text{SM}_i + s_3 \text{SS}_i$$

$$\text{Cor}(\text{LFMC}_{ji}; \text{LFMC}_{ji'}) = f(\text{ARMA}_{[s,q]})$$

$$A_{0j} \sim \mathcal{N}(\mu_{A_{0j}}; \sigma_{A_0}^2) ; w_{0j} \sim \mathcal{N}(\mu_{w_{0j}}; \sigma_{w_0}^2) ; m_{0j} \sim \mathcal{N}(\mu_{m_{0j}}; \sigma_{m_0}^2) ; s_{0j} \sim \mathcal{N}(\mu_{s_{0j}}; \sigma_{s_0}^2)$$

(2) R output (line 163 in script s2.R)

```
> M1 <- update(nl.me.ml.2, method = "REML")
> summary(M1)
```

```
Nonlinear mixed-effects model fit by REML
Model: lfmc ~ SSd1f(time, A, w, m, s)
Data: lfmc.data.gd
      AIC      BIC    logLik
1931.668 1983.689 -950.834

Random effects:
Formula: A ~ 1 | group
      A.(Intercept) Residual
StdDev:      9.408521 7.162899

Variance function:
Structure: Different standard deviations per stratum
Formula: ~1 | leaf.type
Parameter estimates:
      Grass W      Grass E      M. spinosum S. bracteolactus
      1.0000000      0.8851764      3.1796104      2.9647391

Fixed effects: list(A + w ~ leaf.type, m + s ~ 1)
      Value Std.Error DF t-value p-value
A.(Intercept)      54.25350  5.988181 226  9.060097 0e+00
A.leaf.typeGrass E      30.92293  8.835210 226  3.499966 6e-04
A.leaf.typeM. spinosum      223.24504 15.915557 226 14.026844 0e+00
A.leaf.typeS. bracteolactus      240.27654 16.857356 226 14.253513 0e+00
w.(Intercept)      29.05581  1.712960 226 16.962334 0e+00
w.leaf.typeGrass E     -20.68938  2.592469 226 -7.980569 0e+00
w.leaf.typeM. spinosum      31.67297  7.753176 226  4.085161 1e-04
w.leaf.typeS. bracteolactus      26.97508  8.071111 226  3.342177 1e-03
m      30.92881  2.065196 226 14.976213 0e+00
s     -16.15406  2.365392 226 -6.829339 0e+00

Correlation:
      A.(In) A.l.GE A..M.s A..S.b w.(In) w.l.GE w..M.s w..S.b m
A.leaf.typeGrass E      -0.527
A.leaf.typeM. spinosum     -0.146  0.535
A.leaf.typeS. bracteolactus     -0.115  0.537  0.746
w.(Intercept)      -0.217 -0.034 -0.200 -0.216
w.leaf.typeGrass E     -0.035 -0.283 -0.382 -0.399 -0.258
w.leaf.typeM. spinosum     -0.118 -0.227 -0.547 -0.454  0.157  0.573
w.leaf.typeS. bracteolactus     -0.129 -0.241 -0.462 -0.575  0.188  0.601  0.640
m      -0.217 -0.324 -0.633 -0.666  0.092  0.145  0.161  0.172
s     -0.246 -0.354 -0.710 -0.748  0.416  0.575  0.702  0.752  0.544

Standardized Within-Group Residuals:
      Min      Q1      Med      Q3      Max
-2.27999668 -0.59657156 -0.02042043  0.57273326  3.12017985

Number of Observations: 247
Number of Groups: 12
```

This output is a result of the modelling process, which suggests  $m_1, m_2, m_3, s_1, s_2, s_3, \sigma_{w_0}^2, \sigma_{m_0}^2, \sigma_{s_0}^2$  to be zero.

(3) Table of results (Table 2 in manuscript)

| Parameter       | Estimate                | Meaning                                                                                                                                                                                               |
|-----------------|-------------------------|-------------------------------------------------------------------------------------------------------------------------------------------------------------------------------------------------------|
| $\mu_{A_0}$     | 54.3% [42.5 : 66.0]     | Maximum LFMC ( $\hat{A}$ ) of grasses in the W site. A varies with plot and therefore a hyperparameter is estimated.                                                                                  |
| $A_1$           | 30.9% [13.5 : 48.3]     | Difference between $\hat{A}$ of grasses in the E site and $\hat{A}$ of grasses in W site.                                                                                                             |
| $A_2$           | 223.4% [191.9 : 254.6]  | Difference between $\hat{A}$ of <i>M. spinosum</i> and $\hat{A}$ of grasses in the W site.                                                                                                            |
| $A_3$           | 240.3% [207.1 : 273.5]  | Difference between $\hat{A}$ of <i>S. filaginoides</i> and $\hat{A}$ of grasses in the W site.                                                                                                        |
| $w_0$           | 29.1% [25.7 : 32.4]     | Minimum LFMC ( $\hat{w}$ ) of grasses in the W site.                                                                                                                                                  |
| $w_1$           | -20.7% [-25.8 : -15.6]  | Difference between $\hat{w}$ of grasses in the E site and $\hat{w}$ of grasses in the W site.                                                                                                         |
| $w_2$           | 31.7% [16.4 : 47.0]     | Difference between $\hat{w}$ of <i>M. spinosum</i> and $\hat{w}$ of grasses in the W site.                                                                                                            |
| $w_3$           | 26.7% [11.1 : 42.9]     | Difference between $\hat{w}$ of <i>S. filaginoides</i> and $\hat{w}$ of grasses in the W site.                                                                                                        |
| $m$             | 30.9 days [26.9 : 35.0] | Day when the LFMC half-maximum occurs ( $\hat{m}$ ) in the study area (data suggest one general value for all the leaf types).                                                                        |
| $s$             | -16.1 [-20.8 : -11.5]   | Parameter controlling speed of change ( $\hat{s}$ ) of the LFMC (data suggest one general value for all the leaf types, the negative value indicates vegetation to be drying during the fire season). |
| $\sigma_{base}$ | 7.1% [6.0 : 8.6]        | LFMC variability within-plots (residual standard error) of grass ( $\hat{\sigma}_{gw}$ ) in Site W at the beginning the fire season.                                                                  |
| $\delta_1$      | 0.9 [0.7 : 1.2]         | Ratio between the within-plots standard error of the LFMC of grasses in Site E ( $\hat{\sigma}_{ge}$ ) and grasses in W site ( $\hat{\sigma}_{gw}$ ).                                                 |
| $\delta_2$      | 3.2 [2.4 : 4.0]         | Ratio between the within-plots standard error of the initial LFMC <i>M. spinosum</i> ( $\hat{\sigma}_{sm}$ ) and grasses in W site ( $\hat{\sigma}_{gw}$ ).                                           |
| $\delta_3$      | 3.0 [2.4 : 3.9]         | Ratio between the within-plots standard error of the initial LFMC <i>S. filaginoides</i> ( $\hat{\sigma}_{ss}$ ) and grasses in W site ( $\hat{\sigma}_{gw}$ ).                                       |
| $\sigma_{A_0}$  | 9.4% [3.9 : 15.8]       | Variability among plots (standard deviation) in the maximum LFMC (random effects on $A$ ).                                                                                                            |

(4) Connection between model/table in manuscript and R output

| Parameter        | R output                                                                                                                                                                                                                                                                                                                                    |                  |               |           |          |           |         |               |          |          |     |          |       |
|------------------|---------------------------------------------------------------------------------------------------------------------------------------------------------------------------------------------------------------------------------------------------------------------------------------------------------------------------------------------|------------------|---------------|-----------|----------|-----------|---------|---------------|----------|----------|-----|----------|-------|
| $\mu_{A_0}$      | Fixed effects: list(A + w ~ leaf.type, m + s ~ 1)<br><table border="1"> <thead> <tr> <th></th> <th>value</th> <th>Std.Error</th> <th>DF</th> <th>t-value</th> <th>p-value</th> </tr> </thead> <tbody> <tr> <td>A.(Intercept)</td> <td>54.25350</td> <td>5.988181</td> <td>226</td> <td>9.060097</td> <td>0e+00</td> </tr> </tbody> </table> |                  | value         | Std.Error | DF       | t-value   | p-value | A.(Intercept) | 54.25350 | 5.988181 | 226 | 9.060097 | 0e+00 |
|                  | value                                                                                                                                                                                                                                                                                                                                       | Std.Error        | DF            | t-value   | p-value  |           |         |               |          |          |     |          |       |
| A.(Intercept)    | 54.25350                                                                                                                                                                                                                                                                                                                                    | 5.988181         | 226           | 9.060097  | 0e+00    |           |         |               |          |          |     |          |       |
| $A_1$            | A.leaf.typeGrass E<br><table border="1"> <tbody> <tr> <td></td> <td>30.92293</td> <td>8.835210</td> <td>226</td> <td>3.499966</td> <td>6e-04</td> </tr> </tbody> </table>                                                                                                                                                                   |                  | 30.92293      | 8.835210  | 226      | 3.499966  | 6e-04   |               |          |          |     |          |       |
|                  | 30.92293                                                                                                                                                                                                                                                                                                                                    | 8.835210         | 226           | 3.499966  | 6e-04    |           |         |               |          |          |     |          |       |
| $A_2$            | A.leaf.typeM. spinosum<br><table border="1"> <tbody> <tr> <td></td> <td>223.24504</td> <td>15.915557</td> <td>226</td> <td>14.026844</td> <td>0e+00</td> </tr> </tbody> </table>                                                                                                                                                            |                  | 223.24504     | 15.915557 | 226      | 14.026844 | 0e+00   |               |          |          |     |          |       |
|                  | 223.24504                                                                                                                                                                                                                                                                                                                                   | 15.915557        | 226           | 14.026844 | 0e+00    |           |         |               |          |          |     |          |       |
| $A_3$            | A.leaf.typeS. bracteolactus<br><table border="1"> <tbody> <tr> <td></td> <td>240.27654</td> <td>16.857356</td> <td>226</td> <td>14.253513</td> <td>0e+00</td> </tr> </tbody> </table>                                                                                                                                                       |                  | 240.27654     | 16.857356 | 226      | 14.253513 | 0e+00   |               |          |          |     |          |       |
|                  | 240.27654                                                                                                                                                                                                                                                                                                                                   | 16.857356        | 226           | 14.253513 | 0e+00    |           |         |               |          |          |     |          |       |
| $w_0$            | w.(Intercept)<br><table border="1"> <tbody> <tr> <td></td> <td>29.05581</td> <td>1.712960</td> <td>226</td> <td>16.962334</td> <td>0e+00</td> </tr> </tbody> </table>                                                                                                                                                                       |                  | 29.05581      | 1.712960  | 226      | 16.962334 | 0e+00   |               |          |          |     |          |       |
|                  | 29.05581                                                                                                                                                                                                                                                                                                                                    | 1.712960         | 226           | 16.962334 | 0e+00    |           |         |               |          |          |     |          |       |
| $w_1$            | w.leaf.typeGrass E<br><table border="1"> <tbody> <tr> <td></td> <td>-20.68938</td> <td>2.592469</td> <td>226</td> <td>-7.980569</td> <td>0e+00</td> </tr> </tbody> </table>                                                                                                                                                                 |                  | -20.68938     | 2.592469  | 226      | -7.980569 | 0e+00   |               |          |          |     |          |       |
|                  | -20.68938                                                                                                                                                                                                                                                                                                                                   | 2.592469         | 226           | -7.980569 | 0e+00    |           |         |               |          |          |     |          |       |
| $w_2$            | w.leaf.typeM. spinosum<br><table border="1"> <tbody> <tr> <td></td> <td>31.67297</td> <td>7.753176</td> <td>226</td> <td>4.085161</td> <td>1e-04</td> </tr> </tbody> </table>                                                                                                                                                               |                  | 31.67297      | 7.753176  | 226      | 4.085161  | 1e-04   |               |          |          |     |          |       |
|                  | 31.67297                                                                                                                                                                                                                                                                                                                                    | 7.753176         | 226           | 4.085161  | 1e-04    |           |         |               |          |          |     |          |       |
| $w_3$            | w.leaf.typeS. bracteolactus<br><table border="1"> <tbody> <tr> <td></td> <td>26.97508</td> <td>8.071111</td> <td>226</td> <td>3.342177</td> <td>1e-03</td> </tr> </tbody> </table>                                                                                                                                                          |                  | 26.97508      | 8.071111  | 226      | 3.342177  | 1e-03   |               |          |          |     |          |       |
|                  | 26.97508                                                                                                                                                                                                                                                                                                                                    | 8.071111         | 226           | 3.342177  | 1e-03    |           |         |               |          |          |     |          |       |
| $m$              | m<br><table border="1"> <tbody> <tr> <td></td> <td>30.92881</td> <td>2.065196</td> <td>226</td> <td>14.976213</td> <td>0e+00</td> </tr> </tbody> </table>                                                                                                                                                                                   |                  | 30.92881      | 2.065196  | 226      | 14.976213 | 0e+00   |               |          |          |     |          |       |
|                  | 30.92881                                                                                                                                                                                                                                                                                                                                    | 2.065196         | 226           | 14.976213 | 0e+00    |           |         |               |          |          |     |          |       |
| $s$              | s<br><table border="1"> <tbody> <tr> <td></td> <td>-16.15406</td> <td>2.365392</td> <td>226</td> <td>-6.829339</td> <td>0e+00</td> </tr> </tbody> </table>                                                                                                                                                                                  |                  | -16.15406     | 2.365392  | 226      | -6.829339 | 0e+00   |               |          |          |     |          |       |
|                  | -16.15406                                                                                                                                                                                                                                                                                                                                   | 2.365392         | 226           | -6.829339 | 0e+00    |           |         |               |          |          |     |          |       |
| $\sigma_{base}$  | Random effects:<br>Formula: A ~ 1   group<br><table border="1"> <thead> <tr> <th></th> <th>Residual</th> </tr> </thead> <tbody> <tr> <td>StdDev:</td> <td>7.162899</td> </tr> </tbody> </table>                                                                                                                                             |                  | Residual      | StdDev:   | 7.162899 |           |         |               |          |          |     |          |       |
|                  | Residual                                                                                                                                                                                                                                                                                                                                    |                  |               |           |          |           |         |               |          |          |     |          |       |
| StdDev:          | 7.162899                                                                                                                                                                                                                                                                                                                                    |                  |               |           |          |           |         |               |          |          |     |          |       |
| $\delta_1$       | Variance function:<br>Structure: Different standard deviations per stratum<br>Formula: ~1   leaf.type<br>Parameter estimates:<br><table border="1"> <tbody> <tr> <td>Grass E</td> <td>0.8851764</td> </tr> </tbody> </table>                                                                                                                | Grass E          | 0.8851764     |           |          |           |         |               |          |          |     |          |       |
| Grass E          | 0.8851764                                                                                                                                                                                                                                                                                                                                   |                  |               |           |          |           |         |               |          |          |     |          |       |
| $\delta_2$       | Variance function:<br>Structure: Different standard deviations per stratum<br>Formula: ~1   leaf.type<br>Parameter estimates:<br><table border="1"> <tbody> <tr> <td>M. spinosum</td> <td>3.1796104</td> </tr> </tbody> </table>                                                                                                            | M. spinosum      | 3.1796104     |           |          |           |         |               |          |          |     |          |       |
| M. spinosum      | 3.1796104                                                                                                                                                                                                                                                                                                                                   |                  |               |           |          |           |         |               |          |          |     |          |       |
| $\delta_3$       | 1.0000000 Variance function:<br>Structure: Different standard deviations per stratum<br>Formula: ~1   leaf.type<br>Parameter estimates:<br><table border="1"> <tbody> <tr> <td>S. bracteolactus</td> <td>2.9647391</td> </tr> </tbody> </table>                                                                                             | S. bracteolactus | 2.9647391     |           |          |           |         |               |          |          |     |          |       |
| S. bracteolactus | 2.9647391                                                                                                                                                                                                                                                                                                                                   |                  |               |           |          |           |         |               |          |          |     |          |       |
| $\sigma_{A_0}$   | Random effects:<br>Formula: A ~ 1   group<br><table border="1"> <thead> <tr> <th></th> <th>A.(Intercept)</th> </tr> </thead> <tbody> <tr> <td>StdDev:</td> <td>9.408521</td> </tr> </tbody> </table>                                                                                                                                        |                  | A.(Intercept) | StdDev:   | 9.408521 |           |         |               |          |          |     |          |       |
|                  | A.(Intercept)                                                                                                                                                                                                                                                                                                                               |                  |               |           |          |           |         |               |          |          |     |          |       |
| StdDev:          | 9.408521                                                                                                                                                                                                                                                                                                                                    |                  |               |           |          |           |         |               |          |          |     |          |       |
