# Supplementary material for: A nonlinear mixed‐effects modeling approach for ecological data: Using temporal dynamics of vegetation moisture as an example
Source: PubMed Central journal article supplement (PMC6787861; doi:10.1002/ece3.5543), 2019-08-15
Supplement: ECE3-9-10225-s005.pdf [file ECE3-9-10225-s005.pdf]

**Table 3.** Live fuel moisture content (LFMC) average curves and LFMC curves per plot for each vegetation level (species/growth form) overall and plot level prediction for each leaf type.

Average curves (fixed effect) and curves per plot (random effect) predict the LFMC as a function of the number of days since the first measurement ( $t$ ) and are derived from fitted nonlinear mixed-effects model (Table 2).

| Leaf type                | Overall prediction                                          | Plot level prediction                                                          |
|--------------------------|-------------------------------------------------------------|--------------------------------------------------------------------------------|
| Grasses in the W site    | $\text{LFMC} = \frac{25.2}{1 + e^{(30.9-t)/-16.1}} + 29.1$  | $\text{LFMC}_{(\text{plot } 1)} = \frac{23.3}{1 + e^{(30.9-t)/-16.1}} + 29.1$  |
|                          |                                                             | $\text{LFMC}_{(\text{plot } 2)} = \frac{23.3}{1 + e^{(30.9-t)/-16.1}} + 29.1$  |
|                          |                                                             | $\text{LFMC}_{(\text{plot } 3)} = \frac{29.0}{1 + e^{(30.9-t)/-16.1}} + 29.1$  |
| Grasses in the E site    | $\text{LFMC} = \frac{76.8}{1 + e^{(30.9-t)/-16.1}} + 8.4$   | $\text{LFMC}_{(\text{plot } 1)} = \frac{92.5}{1 + e^{(30.9-t)/-16.1}} + 8.4$   |
|                          |                                                             | $\text{LFMC}_{(\text{plot } 2)} = \frac{65.7}{1 + e^{(30.9-t)/-16.1}} + 8.4$   |
|                          |                                                             | $\text{LFMC}_{(\text{plot } 3)} = \frac{72.2}{1 + e^{(30.9-t)/-16.1}} + 8.4$   |
| <i>Mullinum spinosum</i> | $\text{LFMC} = \frac{216.8}{1 + e^{(30.9-t)/-16.1}} + 60.7$ | $\text{LFMC}_{(\text{plot } 1)} = \frac{223.7}{1 + e^{(30.9-t)/-16.1}} + 60.7$ |
|                          |                                                             | $\text{LFMC}_{(\text{plot } 2)} = \frac{211.4}{1 + e^{(30.9-t)/-16.1}} + 60.7$ |
|                          |                                                             | $\text{LFMC}_{(\text{plot } 3)} = \frac{215.2}{1 + e^{(30.9-t)/-16.1}} + 60.7$ |
| <i>S. filaginoides</i>   | $\text{LFMC} = \frac{238.5}{1 + e^{(30.9-t)/-16.1}} + 56.0$ | $\text{LFMC}_{(\text{plot } 1)} = \frac{247.7}{1 + e^{(30.9-t)/-16.1}} + 56.0$ |
|                          |                                                             | $\text{LFMC}_{(\text{plot } 2)} = \frac{240.9}{1 + e^{(30.9-t)/-16.1}} + 56.0$ |
|                          |                                                             | $\text{LFMC}_{(\text{plot } 3)} = \frac{226.9}{1 + e^{(30.9-t)/-16.1}} + 56.0$ |
